# Supplementary material
Source: Elsevier journal article supplement (https://www.sciencedirect.com/science/article/pii/S0213911120300844)
Supplement: mmc1 [file S0213911120300844:mmc1.docx]

**Apéndice**

**Tabla I**

Variables demográficas, de estructura de los sistemas sanitarios y datos de incidencia, mortalidad y letalidad de COVID-19 en los países del estudio

| País | Casos | Densidad poblacional (personas por km2) | Tasa de Incidencia por 100.000 hab. | Letalidad (muertes por 100 casos) | Tasa de mortalidad por 100.000 hab. | Camas de hospital por 1000 hab. | Índice de letalidad relativa | Tiempo epidémico (días desde el primer caso) | Tiempo hasta los 100 casos (días) | Población mayor de 65 años (%) | Gasto sanitario per cápita ($ USA) | Gasto sanitario en relación con el PIB (%) | Profesionales de medicina por 1000 hab. | Tasa de pruebas* (número por millón de hab.) |
| --- | --- | --- | --- | --- | --- | --- | --- | --- | --- | --- | --- | --- | --- | --- |
| **Europa** |  |  |  |  |  |  |  |  |  |  |  |  |  |  |
| Austria | 1332 | 107,21 | 15,29 | 0,23 | 0,03 | 7,37 | 0,12 | 21 | 12 | 19,00 | 5295,18 | 10,44 | 5,18 | 1777,80 |
| Bélgica | 1243 | 377,21 | 10,94 | 0,40 | 0,04 | 5,66 | 0,45 | 43 | 32 | 18,79 | 4667,88 | 10,04 | 3,08 | 1580,00 |
| República Checa | 434 | 137,60 | 4,09 | 0,00 | 0,00 | 6,63 | 0,00 | 16 | 11 | 19,42 | 2484,63 | 7,15 | 3,69 | 1092,70 |
| Dinamarca | 1024 | 138,07 | 17,93 | 0,39 | 0,07 | 2,61 | 0,11 | 20 | 12 | 19,81 | 5092,98 | 10,35 | 4,00 | 1851,00 |
| Estonia | 225 | 29,01 | 17,15 | 0,00 | 0,00 | 4,69 | 0,00 | 19 | 16 | 19,63 | 1987,72 | 6,68 | 3,47 | 1925,30 |
| Finlandia | 319 | 18,16 | 5,80 | 0,00 | 0,00 | 3,28 | 0,00 | 48 | 43 | 21,72 | 4112,05 | 9,49 | 3,21 | 537,60 |
| Francia | 7730 | 122,34 | 11,94 | 2,26 | 0,27 | 5,98 | 2,33 | 53 | 37 | 20,03 | 4782,29 | 11,54 | 3,16 | 559,10 |
| Alemania | 7156 | 237,37 | 8,74 | 0,18 | 0,02 | 8,00 | 0,25 | 50 | 33 | 21,46 | 5463,33 | 11,14 | 4,25 | 2023,30 |
| Grecia | 387 | 83,22 | 3,46 | 1,29 | 0,04 | 4,21 | 1,20 | 20 | 15 | 21,66 | 2261,16 | 8,45 | 6,07 |  |
| Islandia | 247 | 3,53 | 74,40 | 0,00 | 0,00 | 3,06 | 0,00 | 18 | 13 | 14,80 | 4245,11 | 8,29 | 3,87 | 26772,30 |
| Irlanda | 292 | 70,45 | 6,18 | 0,68 | 0,04 | 2,96 | 1,18 | 17 | 14 | 13,87 | 5299,65 | 7,38 | 3,07 | 1350,20 |
| Italia | 31506 | 205,45 | 53,01 | 7,95 | 4,22 | 3,18 | 7,51 | 47 | 24 | 22,75 | 3427,31 | 8,94 | 3,99 | 3498,70 |
| Holanda | 1705 | 511,46 | 10,04 | 1,41 | 0,14 | 3,32 | 1,75 | 19 | 8 | 19,20 | 5251,24 | 10,36 | 3,58 | 349,20 |
| Noruega | 1308 | 14,55 | 24,89 | 0,23 | 0,06 | 3,60 | 0,09 | 20 | 9 | 17,05 | 6203,45 | 10,50 | 4,66 | 8025,20 |
| Polonia | 238 | 124,04 | 0,62 | 2,10 | 0,01 | 6,62 | 2,39 | 14 | 11 | 17,52 | 1784,40 | 9,08 | 2,38 | 344,50 |
| Portugal | 448 | 112,24 | 4,32 | 0,22 | 0,01 | 3,39 | 0,00 | 15 | 11 | 21,95 | 2778,42 | 9,08 | 4,97 |  |
| Eslovenia | 275 | 102,64 | 13,23 | 0,36 | 0,05 | 4,50 | 0,00 | 13 | 9 | 19,61 | 2772,23 | 8,47 | 3,10 | 4735,70 |
| España | 11178 | 93,53 | 24,12 | 4,39 | 1,06 | 2,97 | 3,69 | 46 | 31 | 19,38 | 3259,80 | 8,97 | 3,88 | 645,70 |
| Suecia | 1167 | 25,00 | 11,86 | 0,69 | 0,08 | 2,22 | 0,29 | 46 | 35 | 20,10 | 5386,73 | 10,93 | 4,12 | 1412,80 |
| Suiza | 2650 | 215,52 | 31,54 | 0,72 | 0,23 | 4,53 | 0,59 | 21 | 10 | 18,62 | 7867,39 | 12,25 | 4,30 | 461,30 |
| Gran Bretaña | 1950 | 274,83 | 2,96 | 3,08 | 0,09 | 2,54 | 2,50 | 47 | 35 | 18,40 | 4177,82 | 9,76 | 2,81 | 959,70 |
| **Otros continentes** |  |  |  |  |  |  |  |  |  |  |  |  |  |  |
| China | 81163 | 148,35 | 5,75 | 3,99 | 0,23 | 4,34 | 3,95 | 78 | 19 | 10,92 | 761,49 | 4,98 | 2,01 | 2820,40 |
| Israel | 427 | 410,53 | 5,21 | 0,00 | 0,00 | 3,02 | 0,00 | 25 | 21 | 11,98 | 2843,04 | 7,31 | 3,14 | 1246,80 |
| Japón | 829 | 347,07 | 0,65 | 3,38 | 0,02 | 13,05 | 2,93 | 63 | 38 | 27,58 | 4592,43 | 10,93 | 2,43 | 117,80 |
| Corea del Sur | 8413 | 529,65 | 16,56 | 1,02 | 0,17 | 12,27 | 0,91 | 58 | 32 | 14,42 | 2711,74 | 7,34 | 2,34 | 6148,00 |
| Australia | 454 | 3,25 | 1,88 | 1,10 | 0,02 | 3,84 | 1,67 | 53 | 46 | 15,66 | 4529,89 | 9,25 | 3,68 | 4588,05 |
| Canadá | 569 | 4,08 | 1,57 | 1,41 | 0,02 | 2,52 | 0,33 | 52 | 46 | 17,23 | 4718,30 | 10,53 | 2,65 | 2288,91 |
| Estados Unidos | 6427 | 35,77 | 1,99 | 1,68 | 0,03 | 2,77 | 1,82 | 57 | 42 | 15,81 | 9869,74 | 17,07 | 2,61 | 213,60 |

*Los datos de Australia, Canadá y los Estados Unidos son promedios de las tasas de las provincias y de los Estados con datos. Los datos de China son de la provincia de Guandong.
